# Supplementary material for: The transcriptional repressor Sum1p counteracts Sir2p in regulation of the actin cytoskeleton, mitochondrial quality control and replicative lifespan in Saccharomyces cerevisiae
Source: PubMed Central journal article supplement (PMC5349106; doi:10.15698/mic2016.02.478), 2016-01-18
Supplement: mic-03-079-s01.pdf [file mic-03-079-s01.pdf]

## Supplemental Data

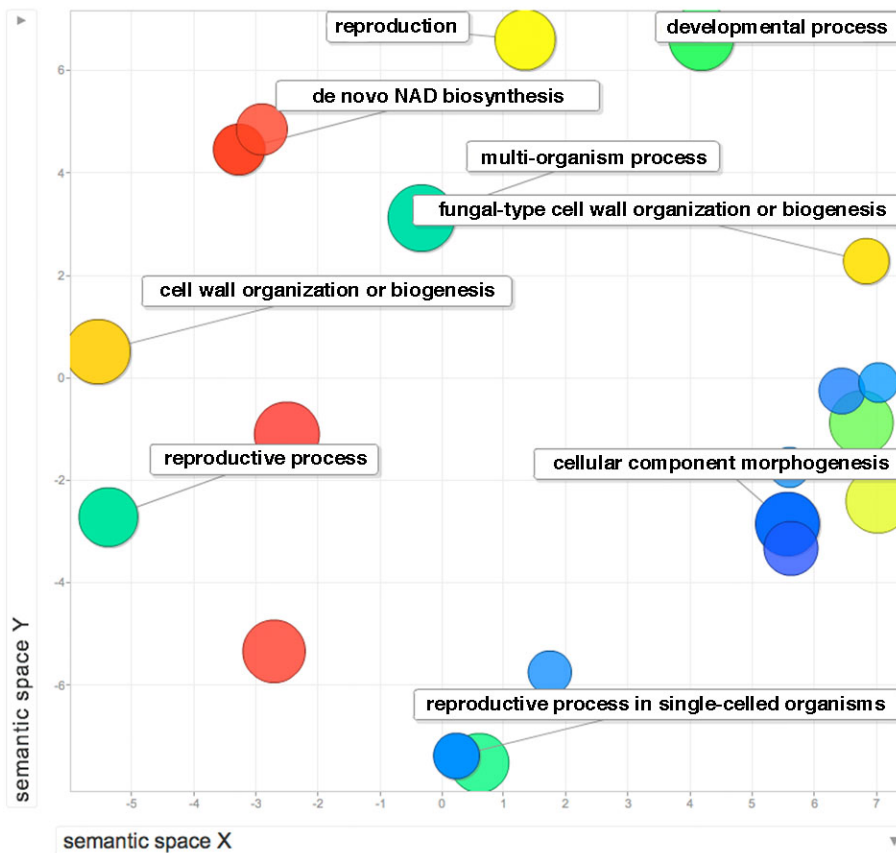

**Fig. S1. Comparative transcriptome analysis reveals Sum1p's role in regulation of NAD biosynthesis, cell wall organization, and reproduction.** Rna isolation was performed in wild-type and *sum1* $\Delta$  cells using a Qiagen RNeasy Mini Kit. RNA-seq was performed as described in *Materials and Methods*, and differential gene expression between wild-type and *sum1* $\Delta$  cells were calculated and are available in Supplemental Table 1-2. Data for overexpressed genes were organized into gene ontology (GO) terms using the *Saccharomyces* Genome Database GO Annotation algorithm – all GO terms can be found in Supplemental Table 3. GO terms were further organized through REVIGO to remove redundant GO terms and group related GO terms in a semantic similarity-based scatterplot. Bubble color indicates the uniqueness of each GO term – the similarity of the GO term to other GO terms – where warmer, redder colors indicate higher uniqueness, and cooler, bluer colors indicate lower uniqueness. Bubble size indicates the frequency of the GO term in the underlying database.

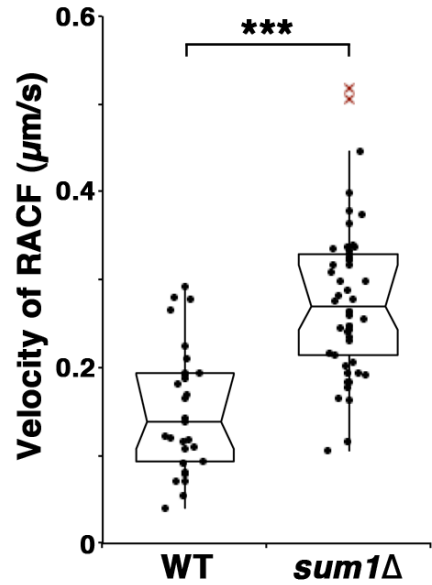

**Fig. S2. Deletion of *SUM1* results in increased RACF.** Notched-dot box plot of the velocity of RACF in WT and *sum1*Δ cells. Wild-type and *sum1*Δ cells expressing Abp140-GFP were imaged at 0.9-sec intervals for 15 sec as described in *Materials and Methods*. Velocity measurements were determined by tracking movement of cables or fiduciary marks along the actin cables as previously described [12]. \*\*\* =  $p < 0.001$ . p-values were calculated using non-parametric Kruskal-Wallis testing.  $n = 29$  cells for wild-type and 50 cells for *sum1*Δ. Data is pooled from 3 independent trials.

| Gene    | Gene Name | Fold Change | p-value     |
|---------|-----------|-------------|-------------|
| YIL130W | ASG1      | 1.649666981 | 0.037948076 |
| YBR084W | MIS1      | 1.652338918 | 0.048551142 |
| YAR042W | SWH1      | 1.666670902 | 0.039089908 |
| YIL117C | PRM5      | 1.675506991 | 0.047300478 |
| YGR187C | HGH1      | 1.703684959 | 0.045690916 |
| YER115C | SPR6      | 1.731887406 | 0.040700141 |
| YMR272C | SCS7      | 1.731993629 | 0.031696193 |
| YOL011W | PLB3      | 1.776705443 | 0.024283181 |
| YOR011W | AUS1      | 1.784641816 | 0.030112853 |
| YPL184C | MRN1      | 1.796784261 | 0.028566347 |
| YEL023C | N/A       | 1.804878299 | 0.027093525 |
| YHR154W | RTT107    | 1.805454729 | 0.027154016 |
| YGR032W | GSC2      | 1.809879998 | 0.009953529 |
| YLR084C | RAX2      | 1.825727357 | 0.020713733 |
| YPR194C | OPT2      | 1.837323883 | 0.023483689 |
| YER060W | FCY21     | 1.996682056 | 0.010289448 |
| YDR409W | SIZ1      | 2.004975139 | 0.010177886 |
| YHL048W | COS8      | 2.010414697 | 0.009944426 |
| YGR258C | RAD2      | 2.029676316 | 0.008979972 |
| YDL223C | HBT1      | 2.034988128 | 0.008527741 |
| YDR317W | HIM1      | 2.045496593 | 0.035935947 |
| YDL167C | NRP1      | 2.062781017 | 0.007612058 |
| YDR503C | LPP1      | 2.068381712 | 0.008715474 |
| YBR063C | N/A       | 2.07959056  | 0.030521144 |
| YLL004W | ORC3      | 2.091833632 | 0.006876399 |
| YOR347C | PYK2      | 2.109725671 | 0.00545232  |
| YLR042C | N/A       | 2.125430683 | 0.014641269 |
| YAR071W | PHO11     | 2.132023357 | 0.006567578 |
| YJR107W | N/A       | 2.163951644 | 0.004002729 |
| YHL050C | N/A       | 2.203687776 | 0.040546033 |
| YLR054C | OSW2      | 2.217728085 | 0.006075381 |
| YOR355W | GDS1      | 2.301476734 | 0.001416495 |
| YLR233C | EST1      | 2.304997428 | 0.00188856  |
| YDL079C | MRK1      | 2.313730682 | 0.008629998 |
| YFL014W | HSP12     | 2.32580821  | 0.005175414 |
| YFR047C | BNA6      | 2.428769297 | 0.001052625 |
| YNL336W | COS1      | 2.448761574 | 0.001418506 |
| YLR341W | SPO77     | 2.459161104 | 0.01378499  |
| YBR076W | ECM8      | 2.499509118 | 0.023551603 |
| YIR030C | DCG1      | 2.564039523 | 0.040924568 |

|           |       |             |             |
|-----------|-------|-------------|-------------|
| YDR403W   | DIT1  | 2.598309294 | 0.023346661 |
| YEL057C   | SDD1  | 2.610922446 | 0.03944945  |
| YJL089W   | SIP4  | 2.725381781 | 0.029779034 |
| YMR069W   | NAT4  | 2.768434529 | 0.019848511 |
| YIR028W   | DAL4  | 2.787343158 | 0.008344466 |
| YDR541C   | N/A   | 2.795336811 | 0.001150582 |
| YCL027W   | FUS1  | 2.801962719 | 0.000243901 |
| YJR027W   | N/A   | 2.866747167 | 0.001761362 |
| YER084W   | N/A   | 2.915722604 | 0.028030921 |
| YIL037C   | PRM2  | 2.940608586 | 0.000414913 |
| YDL186W   | N/A   | 2.943423172 | 0.012910561 |
| YHL012W   | N/A   | 2.959096699 | 0.005108058 |
| YDR273W   | DON1  | 3.03151479  | 0.006275158 |
| YDL035C   | GPR1  | 3.071766796 | 2.17E-06    |
| YML066C   | SMA2  | 3.081210083 | 0.001656355 |
| YCR001W   | N/A   | 3.313136514 | 0.016503259 |
| YBR250W   | SPO23 | 3.48587831  | 0.005753874 |
| YLR040C   | AFB1  | 3.554415348 | 9.23E-06    |
| YAR035W   | YAT1  | 3.55443229  | 0.00050502  |
| YGR087C   | PDC6  | 3.557522867 | 0.017172214 |
| YLL005C   | SPO75 | 3.567075475 | 4.40E-06    |
| YNL202W   | SPS19 | 3.638837676 | 0.01156495  |
| YDR534C   | FIT1  | 3.64725991  | 3.19E-05    |
| YOR237W   | HES1  | 3.717042843 | 0.006607194 |
| YIR027C   | DAL1  | 3.796791441 | 0.000735891 |
| YNL018C   | N/A   | 3.812346913 | 0.003162094 |
| YER188W   | N/A   | 3.843133923 | 0.000246116 |
| YAL037C-A | N/A   | 3.860810675 | 0.019793693 |
| YHR054C   | N/A   | 3.888258783 | 0.01667513  |
| YOR071C   | NRT1  | 3.902683177 | 2.00E-07    |
| YGR144W   | THI4  | 3.903863718 | 0.006325109 |
| YOR388C   | FDH1  | 3.942262377 | 0.043350755 |
| YMR017W   | SPO20 | 3.997545554 | 0.009518141 |
| YPR054W   | SMK1  | 4.131438055 | 7.13E-07    |
| YOR072W-A | N/A   | 4.176592659 | 0.02449823  |
| YFR012W   | DCV1  | 4.183053972 | 0.001929834 |
| YJL219W   | HXT9  | 4.191142578 | 0.009124011 |
| YLR049C   | N/A   | 4.216728814 | 2.07E-07    |
| YLR231C   | BNA5  | 4.25471397  | 1.55E-07    |
| YJR079W   | N/A   | 4.286502992 | 0.040536793 |
| YNR064C   | N/A   | 4.308057482 | 0.000198896 |

|           |       |             |             |
|-----------|-------|-------------|-------------|
| YOR242C   | SSP2  | 4.349664626 | 0.001083286 |
| YAL067C   | SEO1  | 4.466380868 | 0.00048827  |
| YOR365C   | N/A   | 4.467126635 | 2.36E-06    |
| YFR012W-A | N/A   | 4.489529759 | 0.018507919 |
| YGL258W-A | N/A   | 4.805976226 | 0.020656198 |
| YNL279W   | PRM1  | 4.844370987 | 1.95E-08    |
| YKL178C   | STE3  | 4.893102557 | 3.94E-06    |
| YGR256W   | GND2  | 5.020031299 | 1.13E-05    |
| YLR213C   | CRR1  | 5.107021716 | 1.34E-08    |
| YJL045W   | N/A   | 5.135315465 | 0.000160044 |
| YGR225W   | AMA1  | 5.208836344 | 5.76E-05    |
| YOR381W-A | N/A   | 5.226484213 | 0.012957067 |
| YBR300C   | N/A   | 5.299015014 | 0.040212393 |
| YJR159W   | SOR1  | 5.375812333 | 0.044190722 |
| YBL109W   | N/A   | 5.414210992 | 0.037466018 |
| YFL012W-A | N/A   | 5.443009987 | 0.032783019 |
| YKR015C   | N/A   | 5.584766169 | 1.28E-09    |
| YHR216W   | IMD2  | 5.697250368 | 8.34E-10    |
| YGL230C   | N/A   | 5.807037567 | 9.89E-05    |
| YNL204C   | SPS18 | 5.831341694 | 1.34E-05    |
| YER187W   | N/A   | 5.966596528 | 6.63E-10    |
| YOL164W-A | N/A   | 6.074667936 | 0.012623161 |
| YEL059W   | HHY1  | 6.253861681 | 0.002061866 |
| YFL040W   | N/A   | 6.423061928 | 2.16E-10    |
| YGL259W   | YPS5  | 6.777882306 | 0.00182424  |
| YOL160W   | N/A   | 7.110733586 | 0.003594576 |
| YOR011W-A | N/A   | 7.257346649 | 0.001482249 |
| YFL058W   | THI5  | 7.526137266 | 0.008858653 |
| YOL091W   | SPO21 | 8.251871931 | 1.59E-11    |
| YPL272C   | PBI1  | 8.319300732 | 1.33E-12    |
| YHR184W   | SSP1  | 8.862483068 | 5.48E-10    |
| YOL047C   | LDS2  | 9.058792333 | 3.44E-14    |
| YAR035C-A | N/A   | 9.138880966 | 0.017808906 |
| YJR025C   | BNA1  | 9.547365631 | 1.36E-14    |
| YNL332W   | THI12 | 9.595825014 | 0.002690313 |
| YMR082C   | N/A   | 9.676462199 | 0.029279763 |
| tV(CAC)H  | N/A   | 9.676462199 | 0.029279763 |
| YGR260W   | TNA1  | 10.63306735 | 3.92E-26    |
| YHR015W   | MIP6  | 10.74554343 | 1.06E-12    |
| YBR148W   | YSW1  | 11.17330536 | 1.42E-15    |
| YLR307C-A | N/A   | 11.35640355 | 0.000131361 |

|           |        |             |             |
|-----------|--------|-------------|-------------|
| YMR232W   | FUS2   | 11.61981836 | 4.00E-13    |
| RDN5-1    | N/A    | 12.31762217 | 1.76E-07    |
| YAL066W   | N/A    | 12.9019496  | 0.002044379 |
| YOR190W   | SPR1   | 13.07724783 | 3.68E-18    |
| YBL098W   | BNA4   | 13.1633326  | 3.37E-18    |
| YFL062W   | COS4   | 13.5291277  | 8.33E-05    |
| YOR298W   | MUM3   | 13.78413419 | 1.24E-18    |
| YMR321C   | N/A    | 14.01343512 | 2.41E-06    |
| YJL037W   | IRC18  | 14.11566393 | 1.35E-10    |
| YOR339C   | UBC11  | 14.8707536  | 1.06E-09    |
| YPL283C   | YRF1-7 | 15.32106515 | 0.025463513 |
| YHR185C   | PFS1   | 15.59618025 | 2.29E-16    |
| YDR542W   | PAU10  | 16.127437   | 0.001984495 |
| YGR273C   | N/A    | 17.43431551 | 6.93E-07    |
| YJL038C   | LOH1   | 17.50108207 | 2.28E-18    |
| YDR042C   | N/A    | 17.65173992 | 1.23E-17    |
| YCL048W-A | N/A    | 17.84914987 | 8.22E-08    |
| YPR078C   | N/A    | 17.98895499 | 1.54E-13    |
| YOR313C   | SPS4   | 18.46788212 | 1.44E-20    |
| YJL043W   | N/A    | 18.88178579 | 9.01E-14    |
| YFR023W   | PES4   | 18.90215753 | 3.92E-19    |
| YHR125W   | N/A    | 19.11101284 | 4.31E-05    |
| YLR343W   | GAS2   | 19.73629477 | 1.13E-28    |
| YAR075W   | N/A    | 21.23445871 | 0.000595402 |
| YOL024W   | N/A    | 21.40550729 | 1.22E-05    |
| YLR461W   | PAU4   | 23.78796957 | 0.000171501 |
| YBR180W   | DTR1   | 24.96425472 | 3.56E-25    |
| YER084W-A | N/A    | 24.99752735 | 0.00466704  |
| YKL177W   | N/A    | 25.11272333 | 2.06E-05    |
| YAR073W   | IMD1   | 26.87906166 | 4.09E-06    |
| YBR040W   | FIG1   | 27.7293177  | 5.96E-14    |
| YGR059W   | SPR3   | 27.75348177 | 1.33E-25    |
| YFL012W   | N/A    | 28.07640168 | 3.66E-13    |
| YER106W   | MAM1   | 29.48791177 | 2.98E-15    |
| YPL027W   | SMA1   | 32.67299273 | 2.86E-11    |
| YGL170C   | SPO74  | 33.27469722 | 1.39E-20    |
| YJR078W   | BNA2   | 33.5208778  | 3.01E-28    |
| YMR244W   | N/A    | 33.5549429  | 6.43E-17    |
| YDR218C   | SPR28  | 33.66912617 | 2.88E-20    |
| YDR522C   | SPS2   | 37.33958718 | 9.09E-37    |
| YCL026C-A | FRM2   | 39.98260423 | 2.20E-16    |

|           |            |             |             |
|-----------|------------|-------------|-------------|
| YPL021W   | ECM23      | 42.73770805 | 0.000498305 |
| YHR126C   | ANS1       | 44.69603968 | 2.31E-10    |
| YFL011W   | HXT10      | 45.01570852 | 1.00E-19    |
| YBR045C   | GIP1       | 45.60161946 | 2.84E-34    |
| YGR259C   | N/A        | 46.56797433 | 1.94E-06    |
| YOL132W   | GAS4       | 46.76341179 | 4.71E-32    |
| YDL114W   | N/A        | 61.2842606  | 3.96E-17    |
| YPL033C   | SRL4       | 62.26593067 | 1.67E-18    |
| YGL015C   | N/A        | 62.59461485 | 3.81E-19    |
| YML047C   | PRM6       | 67.48712098 | 9.81E-14    |
| YOR214C   | SPR2       | 81.72815867 | 2.42E-19    |
| YPL130W   | SPO19      | 83.32509116 | 9.63E-11    |
| YDR523C   | SPS1       | 90.81538968 | 1.10E-36    |
| YBR200W-A | N/A        | 94.74869237 | 1.32E-13    |
| YGL262W   | N/A        | 102.4092249 | 1.27E-07    |
| YOL165C   | AAD15      | 124.9876367 | 1.78E-06    |
| YFR032C   | RRT5       | 126.9171694 | 1.60E-37    |
| RUF22     | N/A        | 130.6322397 | 1.14E-08    |
| YLR307W   | CDA1       | 132.814187  | 9.20E-43    |
| YKR034W   | DAL80      | 150.1464385 | 1.21E-14    |
| YGL263W   | COS12      | 158.7311972 | 6.90E-29    |
| YPL187W   | MF(ALPHA)1 | 165.6163723 | 6.64E-30    |
| YCL048W   | SPS22      | 192.0099927 | 1.54E-51    |
| YOR255W   | OSW1       | 226.8208818 | 1.78E-25    |
| YAL018C   | LDS1       | 321.3917717 | 1.23E-50    |
| YLR308W   | CDA2       | 1178.310866 | 4.41E-55    |
| YNL318C   | HXT14      | 1291.001332 | 1.23E-61    |
| YGL138C   | N/A        | 1445.287146 | 4.17E-68    |

**Supplemental Table 1. List of up-regulated genes in *sum1* $\Delta$  cells compared to wild-type cells.**

| <b>Systematic Name</b> | <b>Gene Name</b> | <b>Fold Change</b> | <b>p-value</b> |
|------------------------|------------------|--------------------|----------------|
| YLR154W-E              | N/A              | 0.007954346        | 1.43E-36       |
| YDR310C                | SUM1             | 0.024863945        | 5.58E-27       |
| YMR290W-A              | N/A              | 0.218677112        | 0.039145928    |
| YPR053C                | N/A              | 0.277190323        | 0.048441291    |
| YNR069C                | BSC5             | 0.438410502        | 0.011028242    |
| LSR1                   | GTS1             | 0.511322177        | 0.018727608    |
| YGR023W                | MTL1             | 0.523739856        | 0.016743233    |
| YMR053C                | STB2             | 0.529436063        | 0.024390138    |
| YDL184C                | RPL41A           | 0.549172748        | 0.004015633    |
| YOL158C                | ENB1             | 0.558785338        | 0.021999907    |
| YCR097W                | HMRA1            | 0.560888468        | 0.020191057    |
| YDL039C                | PRM7             | 0.565067503        | 0.015503649    |
| YGR008C                | STF2             | 0.56750462         | 0.016803479    |
| YMR066W                | SOV1             | 0.570806828        | 0.036213918    |
| YBL026W                | LSM2             | 0.574696047        | 0.03828476     |
| YDL133C-A              | RPL41B           | 0.593553692        | 0.011568373    |
| YNL160W                | YGP1             | 0.597211541        | 0.026759813    |
| YNL259C                | ATX1             | 0.59956841         | 0.03915263     |
| YGL178W                | MPT5             | 0.617350098        | 0.041686235    |
| YFR032C-A              | RPL29            | 0.617710432        | 0.018476205    |
| YEL003W                | GIM4             | 0.622356313        | 0.030466938    |
| snR86                  | n/a              | 0.631685494        | 0.042111057    |
| YOL109W                | ZEO1             | 0.639004023        | 0.038365457    |

**Supplemental Table 2. List of down-regulated genes in *sum1* $\Delta$  cells compared to wild-type cells.**



|            |                                                          |       |       |
|------------|----------------------------------------------------------|-------|-------|
| GO:0000003 | reproduction                                             | 0.21% | 1     |
| GO:0022414 | reproductive process                                     | 0.12% | 0.955 |
| GO:0032502 | developmental process                                    | 1.39% | 0.956 |
| GO:0032505 | reproduction of a single-celled organism                 | 0.13% | 0.666 |
| GO:0051321 | meiotic cell cycle                                       | 0.02% | 0.626 |
| GO:1903046 | meiotic cell cycle process                               | 0.02% | 0.594 |
| GO:0034293 | sexual sporulation                                       | 0.00% | 0.337 |
| GO:0044703 | multi-organism reproductive process                      | 0.07% | 0.645 |
| GO:0044702 | single organism reproductive process                     | 0.10% | 0.615 |
| GO:0019953 | sexual reproduction                                      | 0.05% | 0.553 |
| GO:0003006 | developmental process involved in reproduction           | 0.08% | 0.383 |
| GO:0022413 | reproductive process in single-celled organism           | 0.00% | 0.62  |
| GO:0051704 | multi-organism process                                   | 2.77% | 0.956 |
| GO:0071554 | cell wall organization or biogenesis                     | 1.11% | 0.927 |
| GO:0071852 | fungus-type cell wall organization or biogenesis         | 0.00% | 0.767 |
| GO:0045229 | external encapsulating structure organization            | 0.90% | 0.729 |
| GO:0007049 | cell cycle                                               | 1.41% | 0.873 |
| GO:0043934 | sporulation                                              | 0.08% | 0.544 |
| GO:0009435 | NAD biosynthetic process                                 | 0.21% | 0.824 |
| GO:0034354 | 'de novo' NAD biosynthetic process from tryptophan       | 0.01% | 0.841 |
| GO:0034627 | 'de novo' NAD biosynthetic process                       | 0.01% | 0.841 |
| GO:0022402 | cell cycle process                                       | 0.53% | 0.747 |
| GO:0070726 | cell wall assembly                                       | 0.00% | 0.72  |
| GO:0009272 | fungus-type cell wall biogenesis                         | 0.00% | 0.653 |
| GO:0071940 | fungus-type cell wall assembly                           | 0.00% | 0.634 |
| GO:0031505 | fungus-type cell wall organization                       | 0.00% | 0.644 |
| GO:0042244 | spore wall assembly                                      | 0.00% | 0.405 |
| GO:0030476 | ascospore wall assembly                                  | 0.00% | 0.211 |
| GO:0070591 | ascospore wall biogenesis                                | 0.00% | 0.211 |
| GO:0042546 | cell wall biogenesis                                     | 0.80% | 0.648 |
| GO:0071555 | cell wall organization                                   | 0.79% | 0.639 |
| GO:0070590 | spore wall biogenesis                                    | 0.00% | 0.446 |
| GO:0048646 | anatomical structure formation involved in morphogenesis | 0.13% | 0.528 |
| GO:0030154 | cell differentiation                                     | 0.28% | 0.485 |
| GO:0044767 | single-organism developmental process                    | 1.35% | 0.466 |
| GO:0048468 | cell development                                         | 0.13% | 0.466 |

|            |                                                               |       |       |
|------------|---------------------------------------------------------------|-------|-------|
| GO:0010927 | cellular component assembly involved in morphogenesis         | 0.02% | 0.418 |
| GO:0009653 | anatomical structure morphogenesis                            | 1.01% | 0.481 |
| GO:0048856 | anatomical structure development                              | 1.24% | 0.481 |
| GO:0030435 | sporulation resulting in formation of a cellular spore        | 0.05% | 0.451 |
| GO:0048869 | cellular developmental process                                | 1.06% | 0.456 |
| GO:0032989 | cellular component morphogenesis                              | 0.85% | 0.358 |
| GO:0000755 | cytogamy                                                      | 0.00% | 0.576 |
| GO:0030437 | ascospore formation                                           | 0.00% | 0.314 |
| GO:0043935 | sexual sporulation resulting in formation of a cellular spore | 0.00% | 0.318 |

**Supplemental Table 3. List of upregulated genes grouped into GO terms.** All genes listed in Supplemental Table 1 were further grouped into GO terms using the *Saccharomyces* Genome Database GO Annotation algorithm. Frequency and uniqueness of each GO term were calculated during further grouping of GO terms using REVIGO. Frequency describes how general a GO term is, where a higher frequency represents a more general GO term. Uniqueness describes the similarity of the GO term to other GO terms where a higher value represents less similarity.

| Strains | Genotype                                                                                                        | Source          |
|---------|-----------------------------------------------------------------------------------------------------------------|-----------------|
| BY4741  | <i>MATa his3Δ1 leu2Δ0 met15Δ0 ura3Δ0</i>                                                                        | Open Biosystems |
| RHY009  | <i>MATa his3Δ1 leu2Δ0 met15Δ0 ura3Δ0 sir2Δ::LEU2</i>                                                            | [8]             |
| RHY010  | <i>MATa his3Δ1 leu2Δ0 met15Δ0 ura3Δ0 sir2Δ::LEU2 [pmito-roGFP1:URA3]</i>                                        | [8]             |
| RHY016  | <i>MATa his3Δ1 leu2Δ0 met15Δ0 ura3Δ0 SIR2-3HA-kanMX6 sum1Δ::LEU2</i>                                            | This study      |
| RHY018  | <i>MATa his3Δ1 leu2Δ0 met15Δ0 ura3Δ0 SIR2-3HA-kanMX6 sum1Δ::LEU2 [pmito-roGFP1:URA3]</i>                        | This study      |
| RHY025  | <i>MATa his3Δ1 leu2Δ0 met15Δ0 ura3Δ0 [pmito-roGFP1:URA3]</i>                                                    | [8]             |
| RHY031  | <i>MATa his3Δ1 leu2Δ0 met15Δ0 ura3Δ0 SIR2-3HA-kanMX6 [pmito-roGFP1:URA3] [pRS413-SIR2-3HA:HIS3]</i>             | [8]             |
| RHY036  | <i>MATa his3Δ1 leu2Δ0 met15Δ0 ura3Δ0 SIR2-3HA-kanMX6 sum1Δ::LEU2 sir2Δ::kanMX6 [pmito-roGFP1:URA3]</i>          | This study      |
| RHY050  | <i>MATa his3Δ1 leu2Δ0 met15Δ0 ura3Δ0 ABP140- GFP(S65T)-KanMX6</i>                                               | [8]             |
| RHY088  | <i>MATa his3Δ1 leu2Δ0 met15Δ0 ura3Δ0 ABP140- GFP(S65T)-KanMX6 sum1Δ::LEU2</i>                                   | This study      |
| RHY099  | <i>MATa his3Δ1 leu2Δ0 met15Δ0 ura3Δ0 SIR2-3HA-kanMX6 sum1Δ::LEU2 [pRS413-SIR2-3HA:HIS3]</i>                     | This study      |
| RHY 104 | <i>MATa his3Δ1 leu2Δ0 met15Δ0 ura3Δ0 SIR2-3HA-kanMX6 sum1Δ::LEU2 [pRS413-SIR2-3HA:HIS3] [pmito-roGFP1:URA3]</i> | This study      |
| RHY117  | <i>MATa his3Δ1 leu2Δ0 met15Δ0 ura3Δ0 SIR2-3HA-kanMX6 sum1Δ::0 sir2Δ::KanMX6</i>                                 | This study      |
| RHY124  | <i>MATa his3Δ1 leu2ΔTUB1-GFP::LEU2 met15Δ0 ura3Δ0</i>                                                           | This study      |
| RHY126  | <i>MATa his3Δ1 leu2ΔTUB1-GFP::LEU2 met15Δ0 ura3Δ0 sir2Δ::LEU2</i>                                               | This study      |
| RHY128  | <i>MATa his3Δ1 leu2ΔTUB1-GFP::LEU2 met15Δ0 ura3Δ0 SIR2-3HA-kanMX6 sum1Δ::LEU2</i>                               | This study      |
| RHY130  | <i>MATa his3Δ1 leu2ΔTUB1-GFP::LEU2 met15Δ0 ura3Δ0 sum1Δ::0 sir2Δ::KanMX6</i>                                    | This study      |

**Supplemental Table 4. Strains used in this study.**

| <b>Purpose</b>                                 | <b>Forward Primer</b>                                                                 | <b>Reverse Primer</b>                                                                  | <b>Forward Sequencing Primer</b>       | <b>Reverse Sequencing Primer</b>          |
|------------------------------------------------|---------------------------------------------------------------------------------------|----------------------------------------------------------------------------------------|----------------------------------------|-------------------------------------------|
| <i>sir2</i> $\Delta$<br>using<br><i>KanMX6</i> | CCATTCTCAC<br>GTATTTCAAG<br>AAATTAGGCA<br>TCGCTTCGG<br>CGGATCCCC<br>GGGTTAATTA<br>A   | GACTACAATA<br>ATTGAAAGG<br>AAAACAAAAT<br>TGTTTGCCG<br>AATTGAGCT<br>CGTTTAAAC           | AATGATTTGA<br>ATTTGCTGTT<br>CCACC      | CCAACCATG<br>GTCCAGGAC<br>AGCCAG          |
| <i>sum1</i> $\Delta$<br>using<br><i>LEU2</i>   | AAGTTTCATA<br>CATAATTAAC<br>AAAATTCGTT<br>TGTTGCGGG<br>GTGCAGGTC<br>GACAACCCT<br>TAAT | TTTTTATCTA<br>TTCTCGAAAC<br>TGCCCCAAC<br>GTACGGACC<br>AGCGCAGCG<br>TACGGATATC<br>ACCTA | CAGCAAACA<br>GAG<br>CACAAAGGA<br>CTT G | GGTACTTG<br>GTT<br>GGGCATAGT<br>AAC GGTCC |

**Supplemental Table 5: List of deletion primers used in this study.**
